# Supplementary material for: Er3+/Tm3+ co-doped Zr0.85Y0.15O1.925:Yb3+ phosphors: dual-mode ratiometric thermometry based on near infrared up-conversion/down-shifting photoluminescence
Source: Royal Society of Chemistry journal article supplement (doi:10.1039/d4dt01972e), 2024-01-01
Supplement: d4dt01972e1.pdf [file d4dt01972e1.pdf]

Electronic supplementary information (ESI) for:

**Er<sup>3+</sup>/Tm<sup>3+</sup> co-doped Zr<sub>0.85</sub>Y<sub>0.15</sub>O<sub>1.925</sub>:Yb<sup>3+</sup> phosphors: Dual-mode ratiometric thermometry based on near infrared up-conversion/down-shifting photoluminescence**

Takuya Hasegawa<sup>a,†</sup>, Yuki Takahashi,<sup>a</sup> Tomoyo Goto,<sup>b,c</sup> Yasushi Sato,<sup>d</sup> Ayahisa Okawa<sup>a</sup> and Shu Yin<sup>a,e</sup>

<sup>a</sup> *Institute of Multidisciplinary Research for Advanced Material (IMRAM), Tohoku University, 2-1-1 Katahira, Aoba-ku, Sendai, Miyagi, 980-8577, Japan*

<sup>b</sup> *SANKEN (The Institute of Scientific and Industrial Research), Osaka University, 8-1 Mihogaoka, Ibaraki, Osaka 567-0047, Japan*

<sup>c</sup> *Institute for Advanced Co-Creation Studies, Osaka University, 1-1 Yamadaoka, Suita, Osaka, 565-0871, Japan*

<sup>d</sup> *Department of Chemistry, Faculty of Science, Okayama University of Science, 1-1 Ridai-cho, Kita-ku, Okayama, 700-0005, Japan*

<sup>e</sup> *Advanced Institute for Materials Research (WPI-AIMR), Tohoku University, 2-1-1 Katahira, Aoba-ku, Sendai, Miyagi, 980-8577, Japan*

†Corresponding author:

Dr. Takuya Hasegawa

Tel/Fax +81-22-217-5598, E-mail: hase@tohoku.ac.jp

## **Contents**

1. **Table S1** *R*-factors of Rietveld analysis for the YSZ:Yb-Er/Tm phosphors with different Yb<sup>3+</sup> concentrations
2. **Figure S1** Lattice volumes refined by Rietveld analysis of the YSZ:Yb-Er/Tm phosphors with different Yb<sup>3+</sup> concentrations.
3. **Figure S2** XRD patterns of the YSZ:Yb-Er and YSZ:Yb-Tm phosphors.
4. **Figure S3** Kubelka-Munk spectra of the YSZ:Yb-Er/Tm phosphors with different Yb<sup>3+</sup> concentrations.
5. **Figure S4** Dependency of Relative PL intensities on the Yb<sup>3+</sup> concentrations of each transition for YSZ:Yb-Er/Tm phosphors.
6. **Figure S5** UCPL spectra of the YSZ:Yb-Er, YSZ:Yb-Tm and YSZ:Yb-Er/Tm (Yb 4.5 mol%) phosphors.
7. **Figure S6** Dependency of Yb<sup>3+</sup> concentrations on the absorbed photon numbers of UCPL in the YSZ:Yb-Er/Tm.
8. **Figure S7** DSPL spectra of YSZ:Yb-Er and YSZ:Yb-Er/Tm (Yb 4.5 mol%) phosphors.
9. **Figure S8** Temperature dependency of PL properties of the YSZ:Yb-Erphosphor: (A) spectra and relative PL peak intensity.
10. **Table S2** Summary of LIRs of YSZ:Yb-Er/Tm (Yb 4.5 mol%) phosphor.

**Table S1** *R*-factors of Rietveld analysis for the YSZ:Yb-Er/Tm phosphors with different Yb<sup>3+</sup> concentrations.

| Yb   | $R_{wp}$ | $R_p$ | $R_R$  | $R_e$ | $S$    | $R_F$ |
|------|----------|-------|--------|-------|--------|-------|
| host | 6.76     | 4.659 | 9.501  | 5.008 | 1.3499 | 0.881 |
| 1.5  | 7.878    | 5.483 | 11.463 | 6.592 | 1.195  | 1.118 |
| 2.5  | 8.177    | 5.799 | 12.249 | 6.599 | 1.2392 | 1.036 |
| 3.5  | 8.118    | 5.744 | 12.491 | 6.881 | 1.1797 | 2.405 |
| 4.5  | 6.634    | 4.667 | 10.076 | 5.028 | 1.3195 | 0.795 |
| 6.5  | 6.697    | 4.698 | 10.003 | 5.023 | 1.3332 | 0.994 |
| 8.5  | 6.689    | 4.734 | 10.403 | 5.323 | 1.2567 | 0.931 |
| 10.5 | 6.899    | 4.873 | 10.478 | 4.946 | 1.3947 | 0.954 |
| 12.5 | 6.921    | 4.907 | 10.67  | 4.977 | 1.3906 | 0.983 |

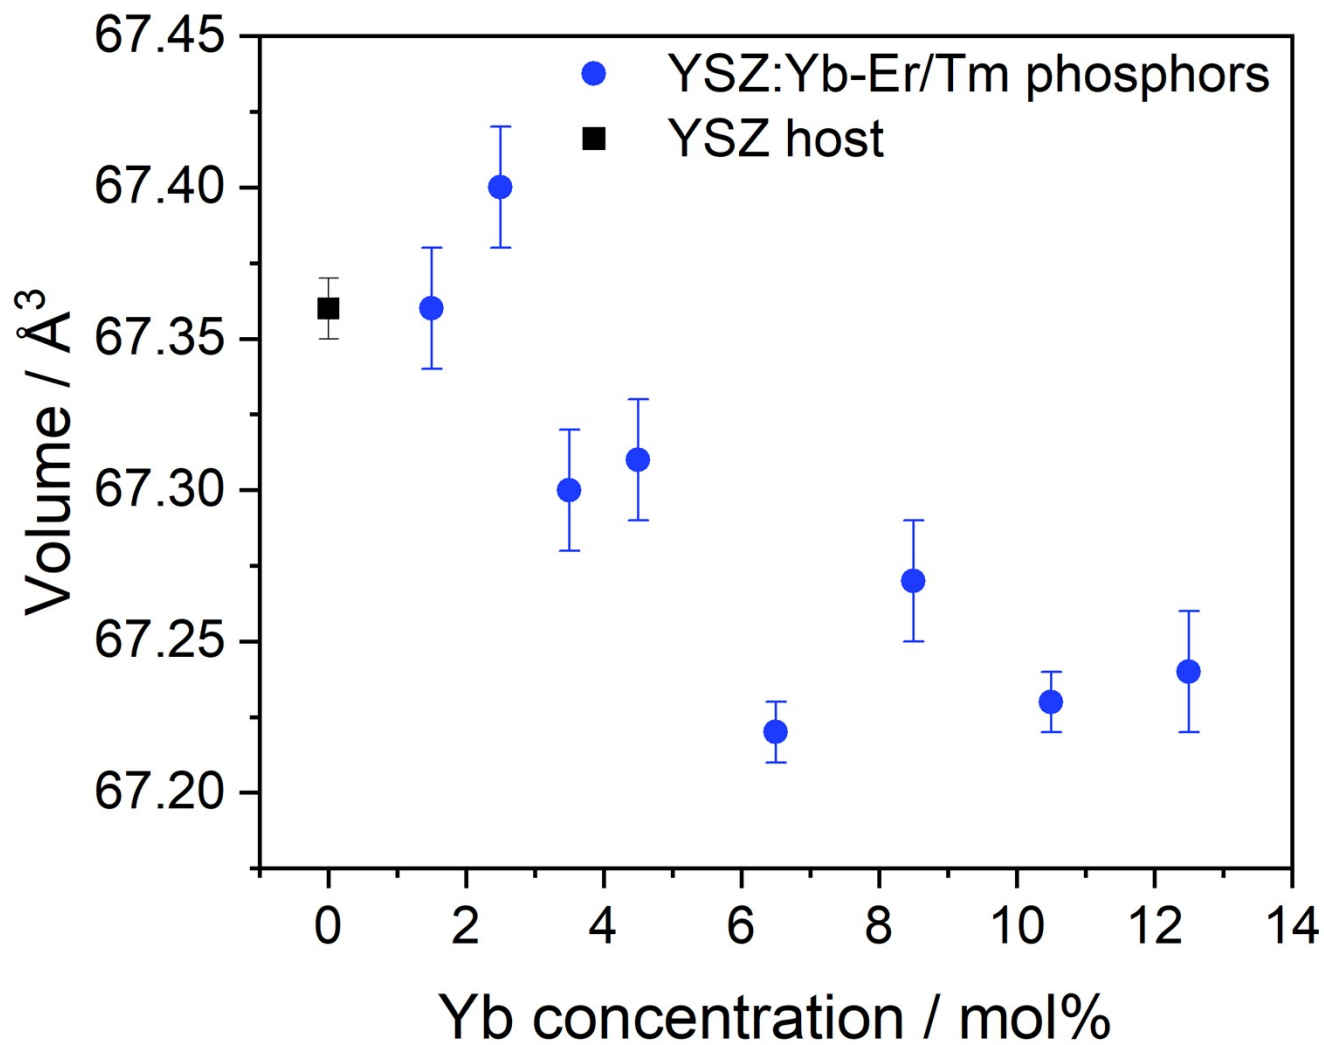

**Figure S1** Lattice volumes refined by Rietveld analysis of the YSZ:Yb-Er/Tm phosphors with different Yb<sup>3+</sup> concentrations.

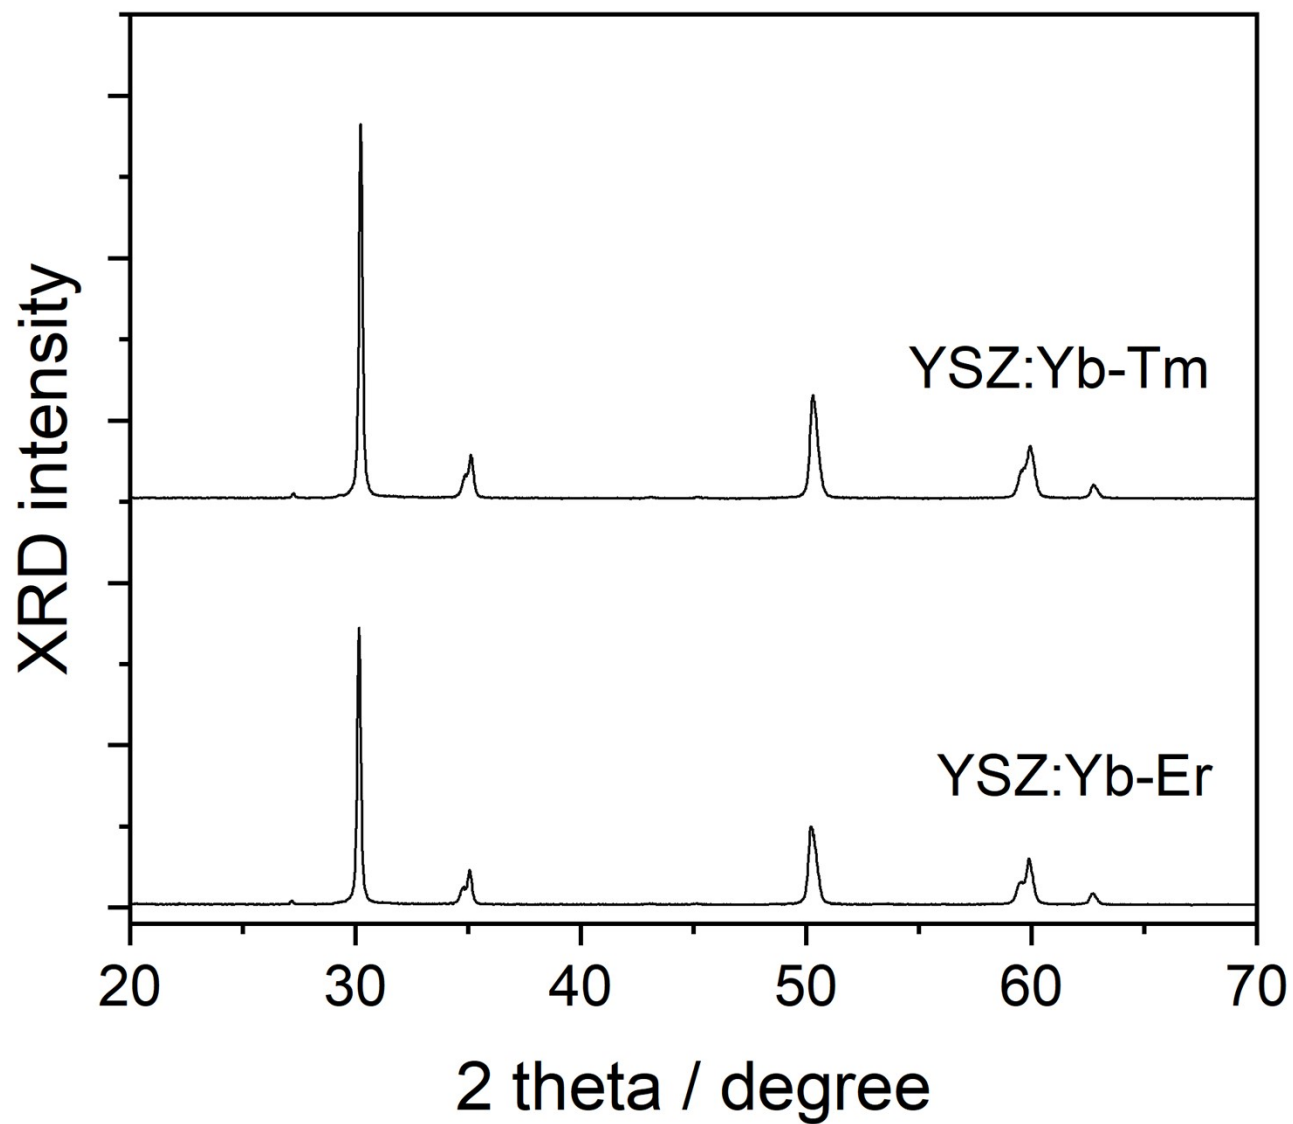

**Figure S2** XRD patterns of the YSZ:Yb-Er and the YSZ:Yb-Tm phosphors.

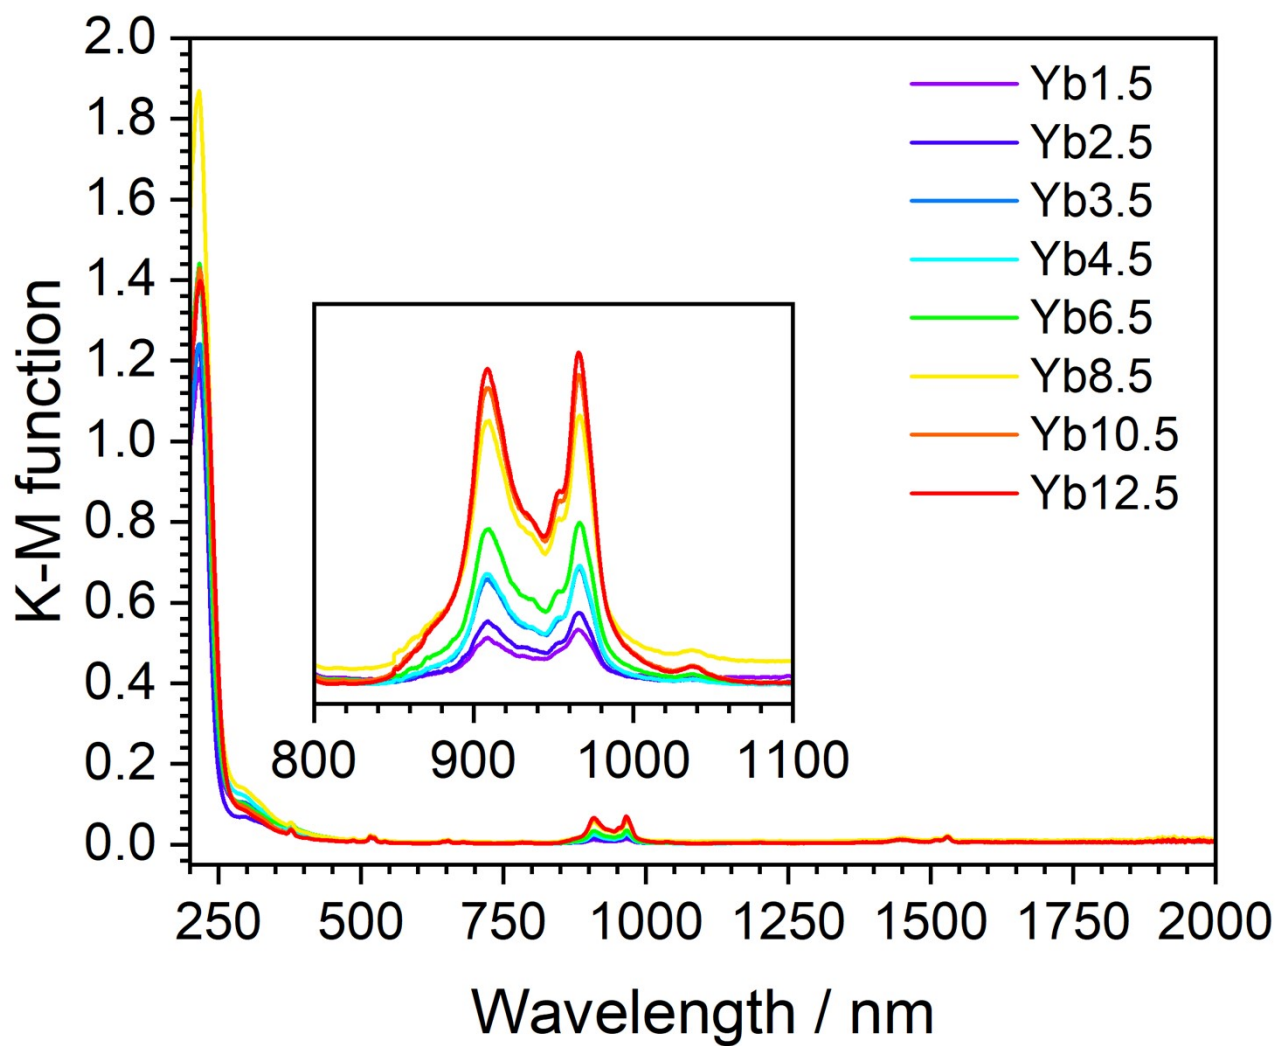

**Figure S3** Kubelka-Munk spectra of the YSZ:Yb-Er/Tm phosphors with different Yb<sup>3+</sup> concentrations.

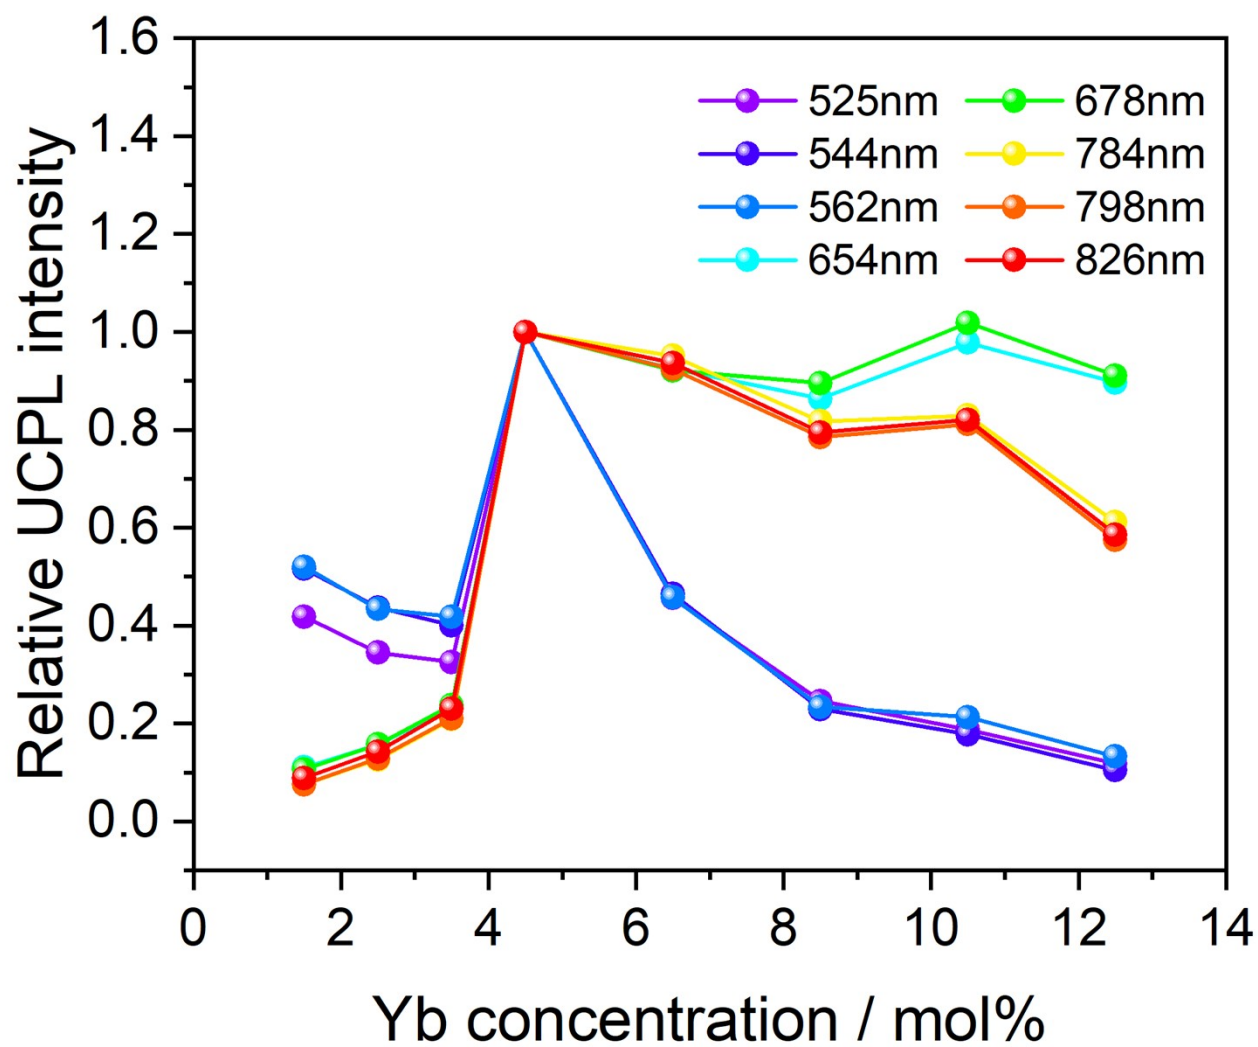

**Figure S4** Dependency of Relative PL intensities on the Yb<sup>3+</sup> concentrations of each transition for YSZ:Yb-Er/Tm phosphors.

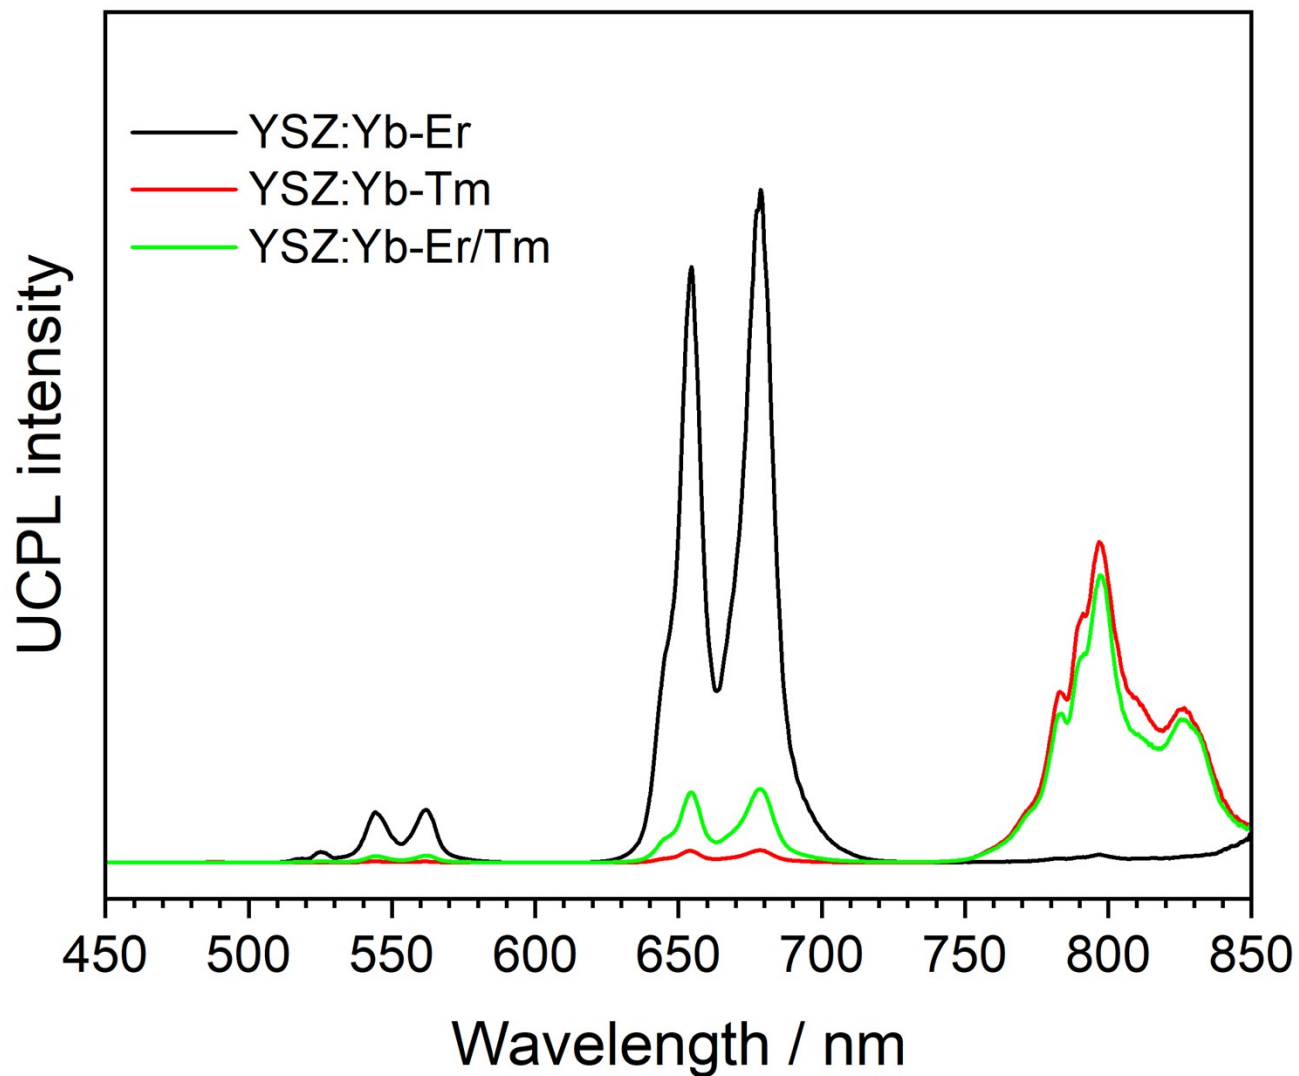

**Figure S5** UCPL spectra of the YSZ:Yb-Er, YSZ:Yb-Tm and YSZ:Yb-Er/Tm (Yb 4.5 mol%) phosphors.



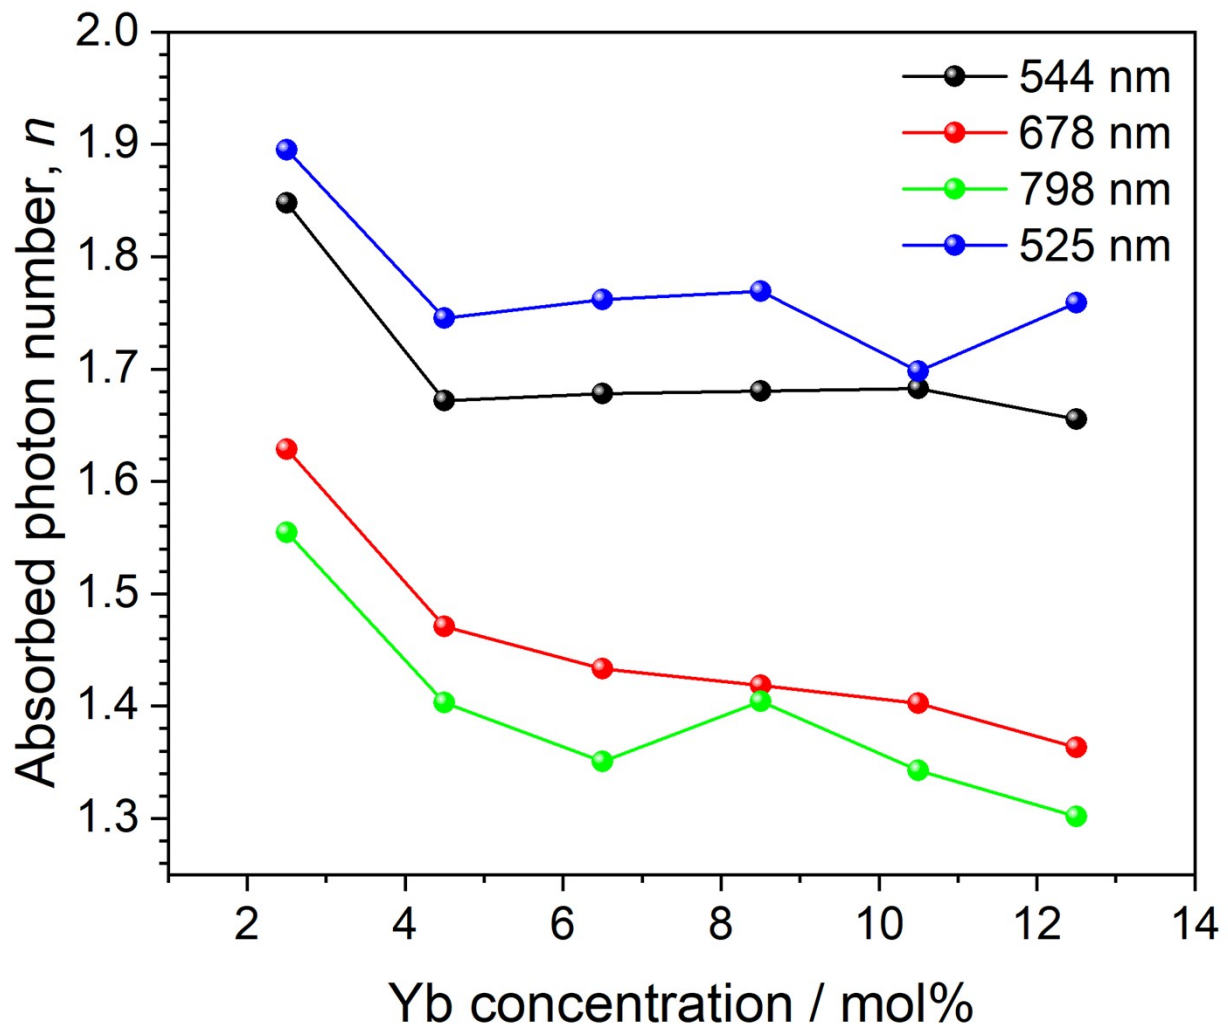

**Figure S6** Dependency of  $\text{Yb}^{3+}$  concentrations on the absorbed photon numbers of UCPL in the YSZ:Yb-Er/Tm.

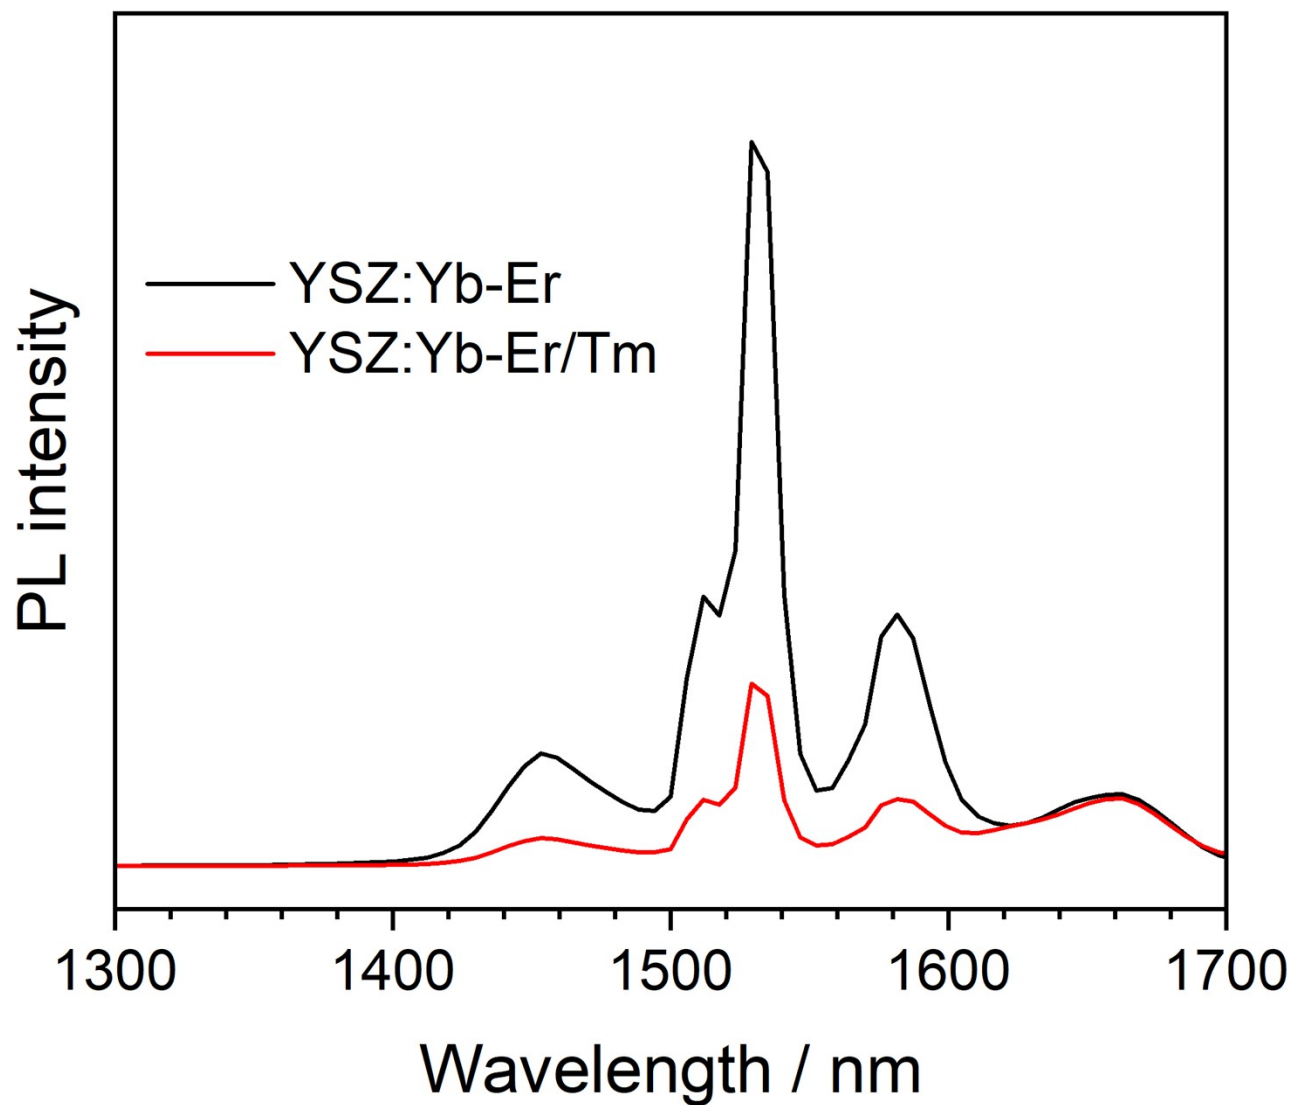

**Figure S7** DSPL spectra of YSZ:Yb-Er and YSZ:Yb-Er/Tm (Yb 4.5 mol%) phosphors.

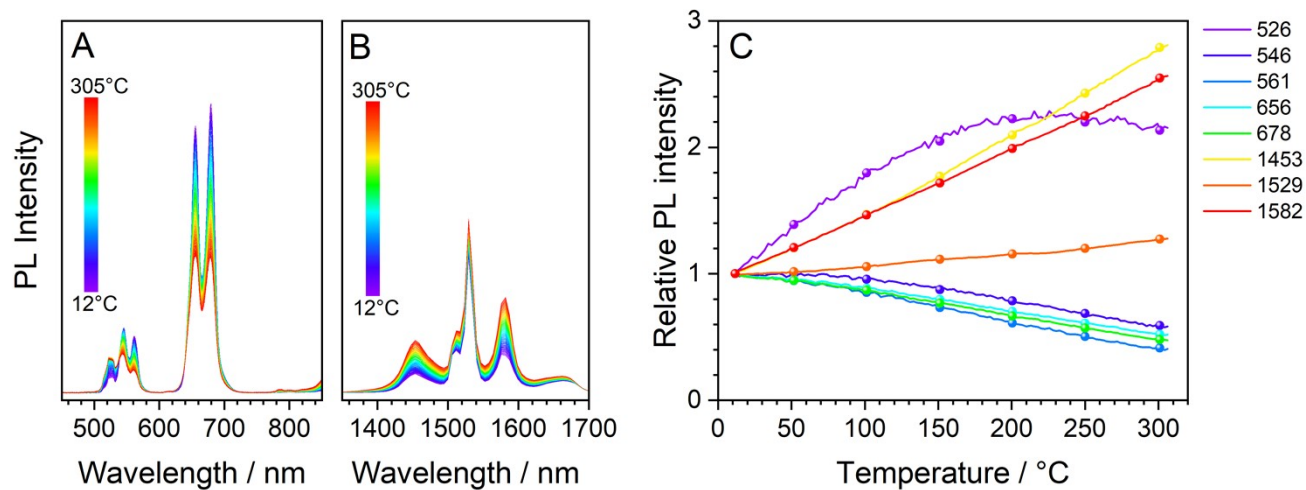

**Figure S8** Temperature dependency of PL properties of the YSZ:Yb-Erphosphor: (A,B) spectra and (C) relative PL peak intensity.

**Table S2** Summary of LIRs of YSZ:Yb-Er/Tm (Yb 4.5 mol%) phosphor.

| LIR         | B     | C      | $\Delta T$ / eV |
|-------------|-------|--------|-----------------|
| 1453/800 nm | 0.081 | 29.934 | 0.17696         |
| 1529/800 nm | 0.194 | 8.544  | 0.133209        |
| 1582/800 nm | 0.183 | 49.849 | 0.168691        |
| 1663/800 nm | 0.556 | 73.759 | 0.220507        |
